# Supplementary figures and images for: Ergothioneine improves cognitive function by ameliorating mitochondrial damage and decreasing neuroinflammation in a d-galactose-induced aging model
Source: Royal Society of Chemistry journal article supplement (doi:10.1039/d4fo02321h), 2024-01-01

## Western blot image in this manuscript

**Fig.4**

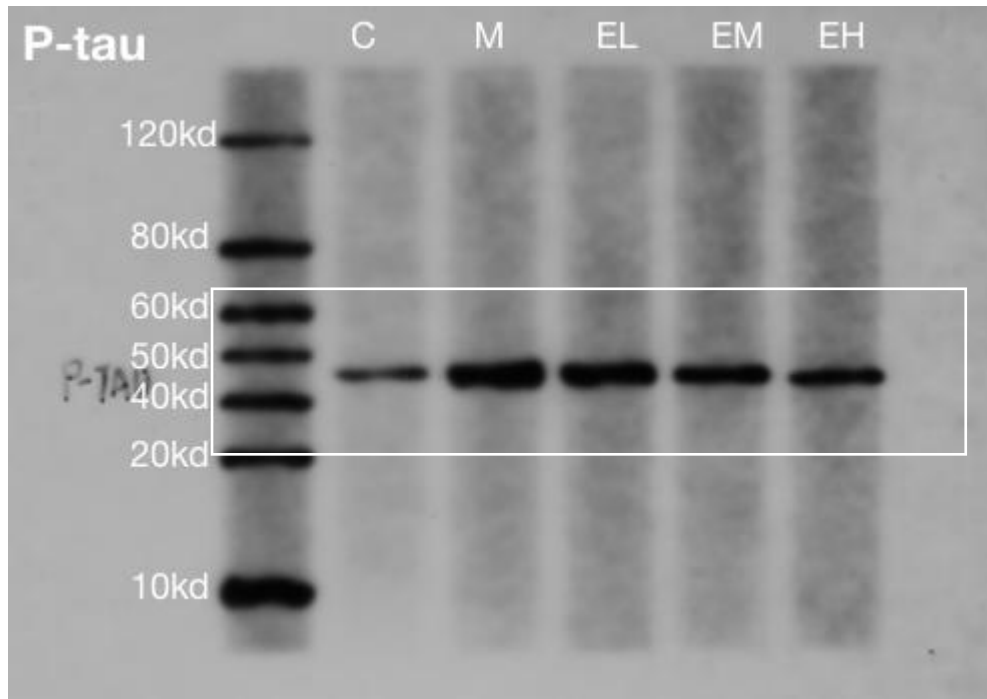

**Fig.6**

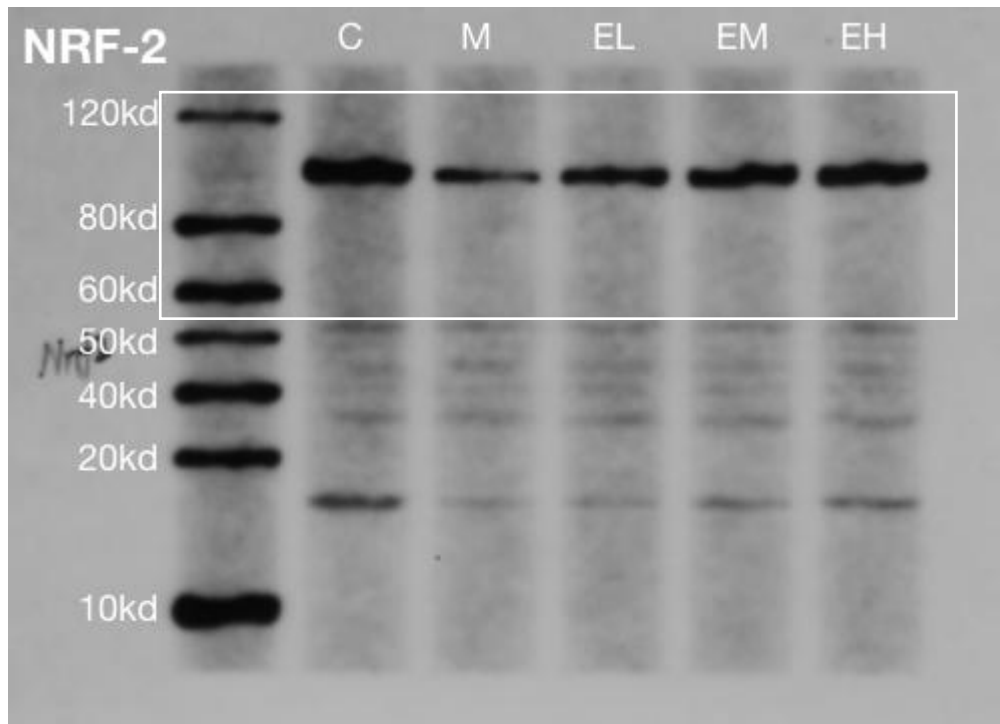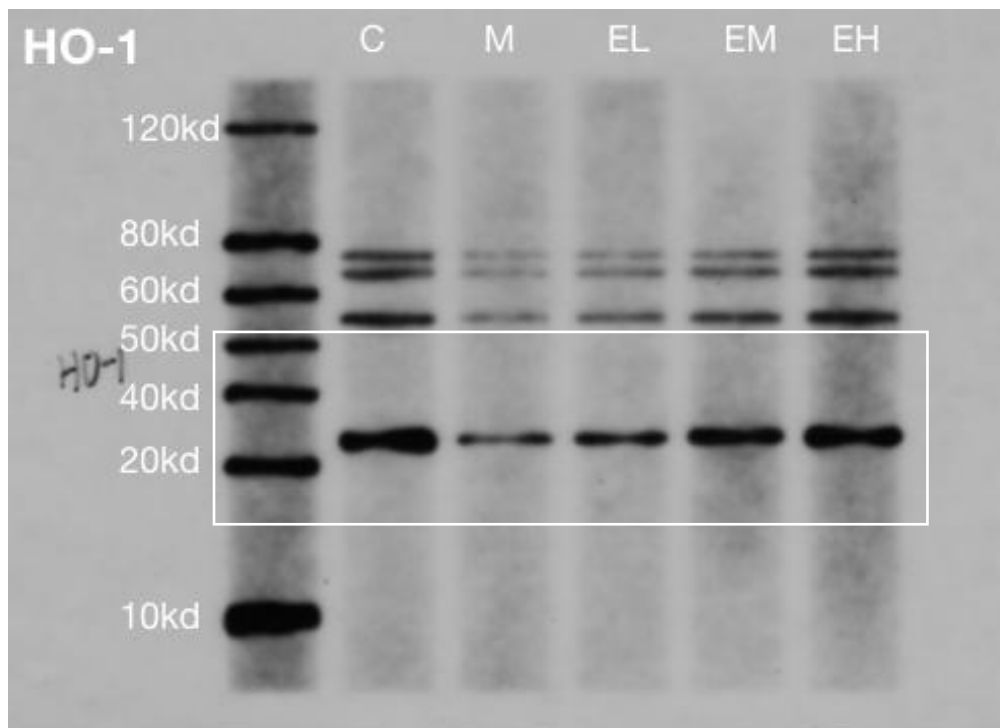

**FIG.7**

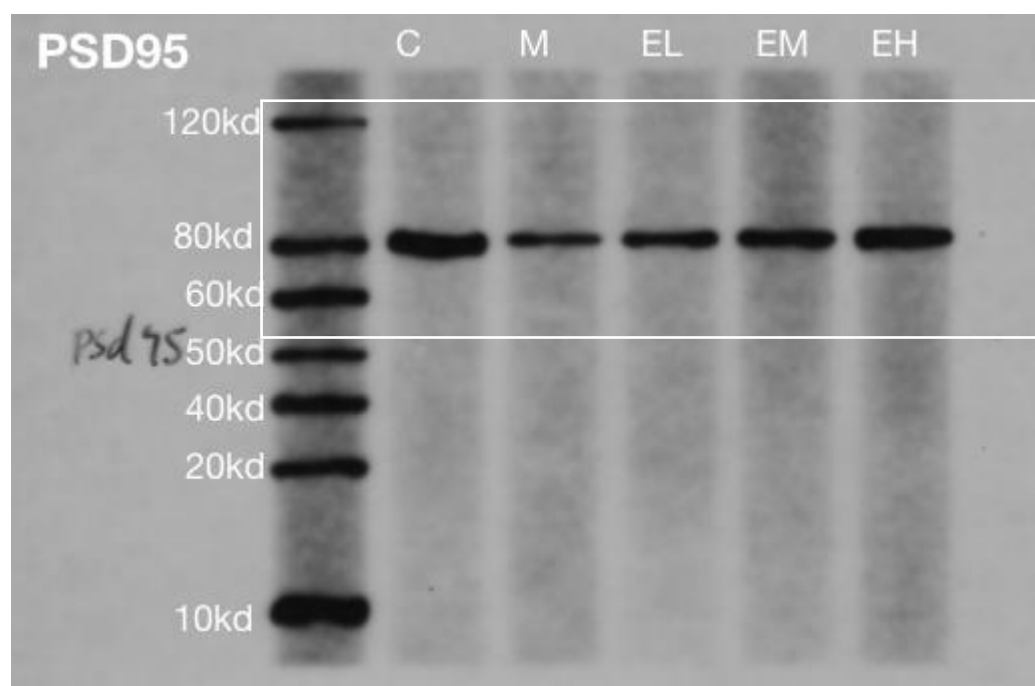

**FIG.8**

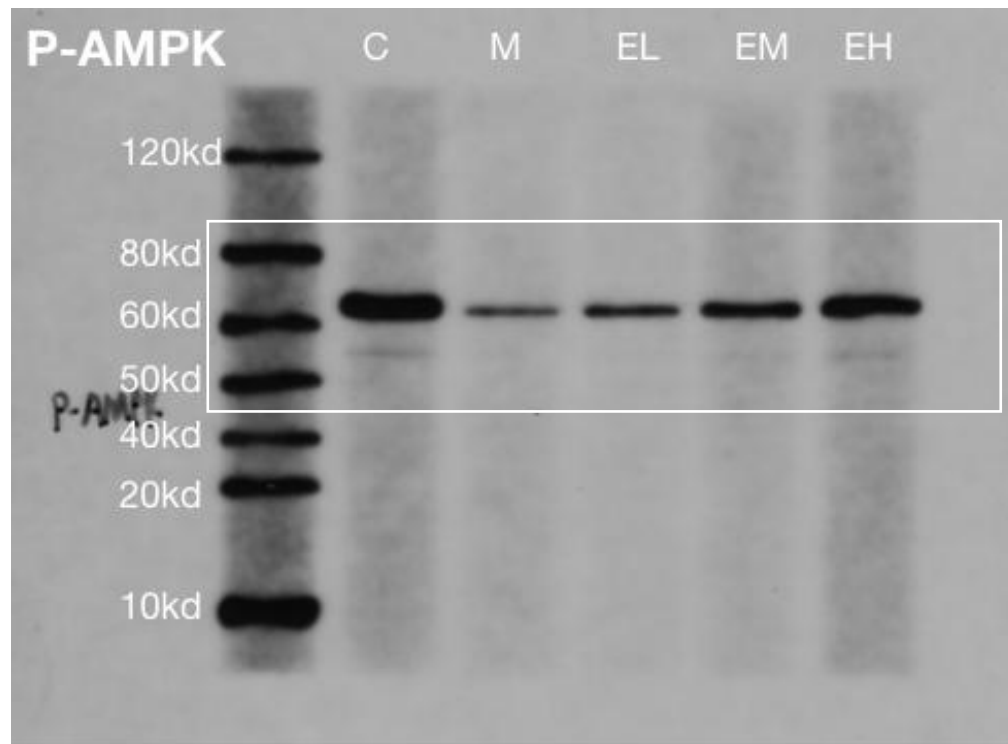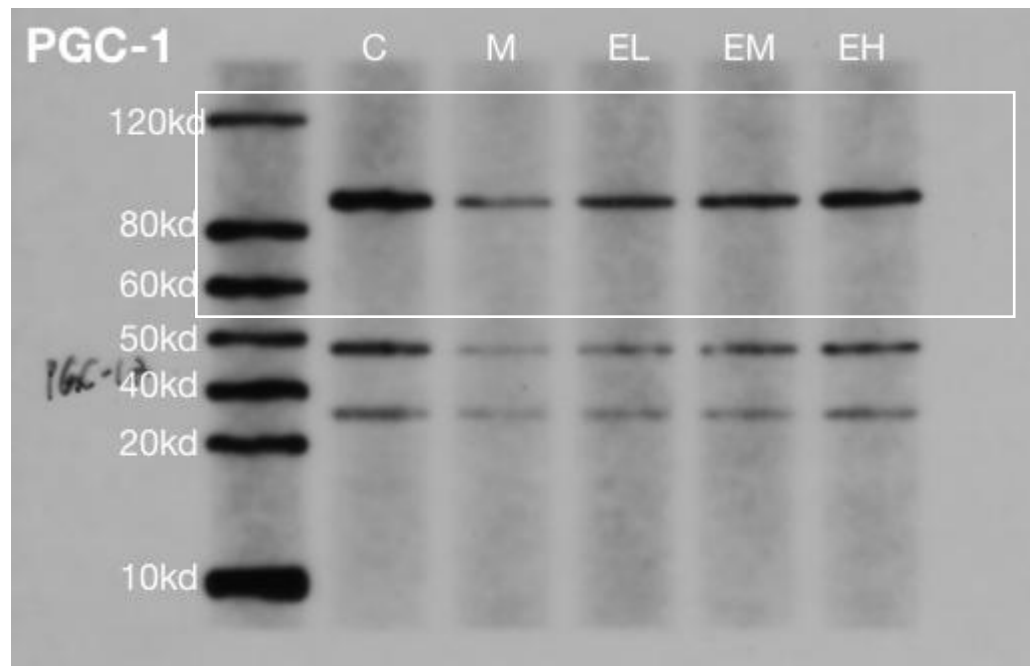

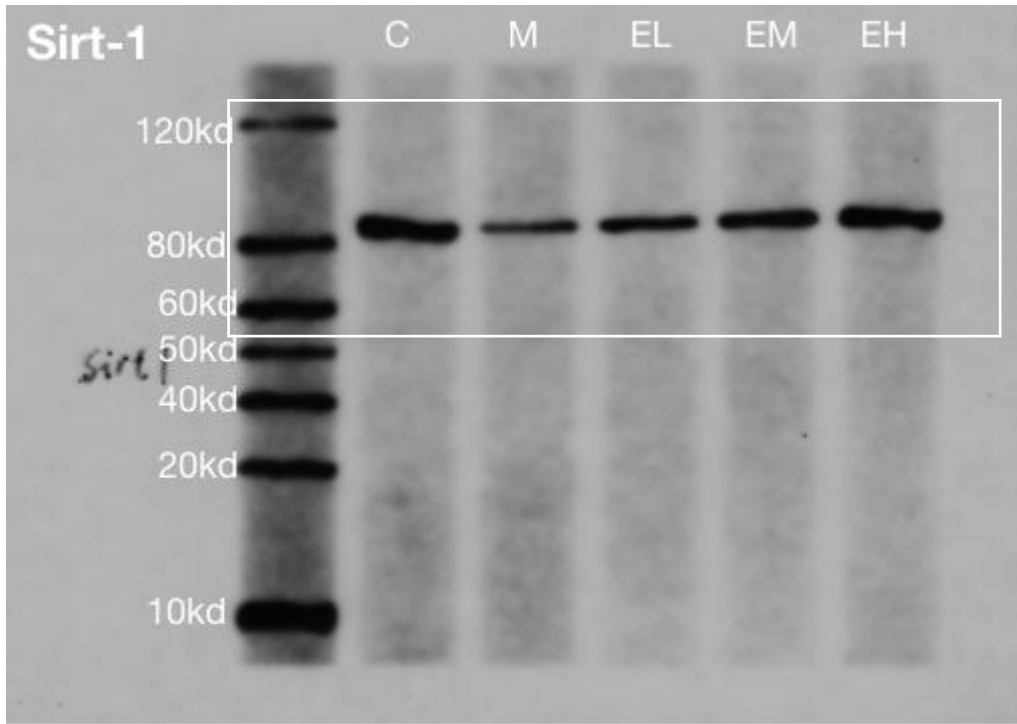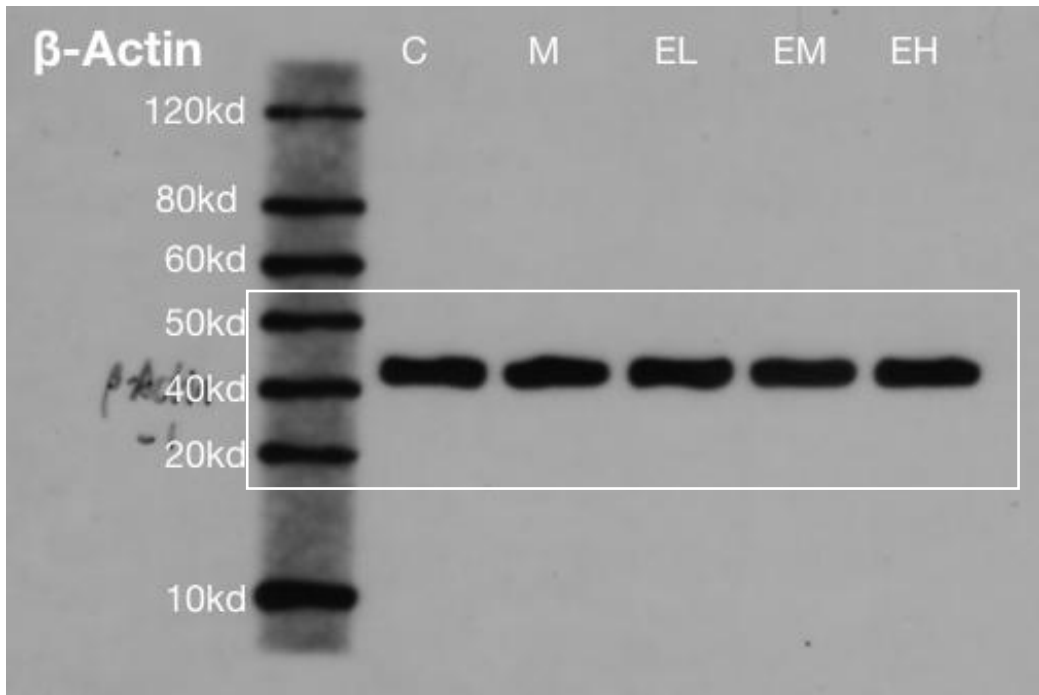

Supplement: d4fo02321h1.pdf [file d4fo02321h1.pdf]
